# Supplementary material for: Non-Volatile Memory Based on ZnO Thin-Film Transistor with Self-Assembled Au Nanocrystals
Source: MDPI journal article supplement (doi:10.3390/nano14080678), 2024-04-14
Supplement: s1 [file s1]

# Non-volatile memory based on ZnO thin-film transistor with self-assembled Au nanocrystals

Hui Xie <sup>1</sup>, Hao Wu <sup>1, 2,\*</sup> and Chang Liu <sup>1</sup>

<sup>1</sup> Key Laboratory of Artificial Micro- and Nano-structures of Ministry of Education, and School of Physics and Technology, Wuhan University, Wuhan 430072, China; h.sieh@whu.edu.cn (H.X.); chang.liu@whu.edu.cn (C.L.)

<sup>2</sup> Hubei Key Laboratory of Nuclear Solid Physics, Wuhan University, Wuhan 430072

\* Correspondence: h.wu@whu.edu.cn (H.W.)

## Supplementary Materials

**Figure S1.** Process flow of the proposed Au NCs ZnO TFT non-volatile memory device

**Figure S2.** HRTEM image of deposited ZnO film by ALD at 100°C

**Figure S3.** EDS spectrum from the EDS mapping of the device for element analysis

**Figure S4.** (a) Transmittance spectrum curve of fabricated ZnO on glass; (b) Tauc plot to determine the optical band gap of the fabricated ZnO

**Figure S5.** (a) AFM image of fabricated AlO<sub>x</sub> tunneling oxide; (b) Current density versus electrical field curves of the Au-Cr/AlO<sub>x</sub>/p++ Si structure, with 3 different measurement positions, which shows the uniform and consistent property

**Table S1.** ALD growth conditions of AlO<sub>x</sub> and ZnO

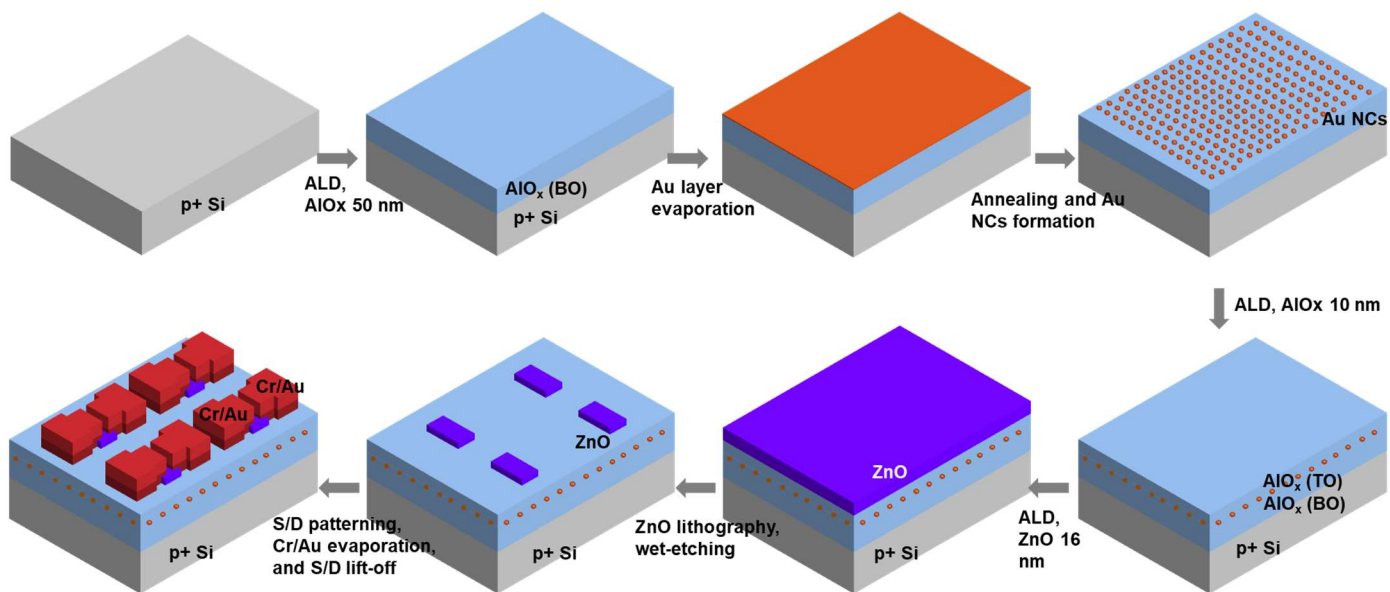

**Figure S1.** Process flow of the proposed Au NCs ZnO TFT non-volatile memory device

**Table S1.** ALD growth conditions of AlO<sub>x</sub> and ZnO.

| Material | Precursor        | Exposure time | Purge time | Grow temperature | Chamber gas flow |
|----------|------------------|---------------|------------|------------------|------------------|
| AlOx     | TMA              | 0.7 s         | 10 s       | 200°C            | 200 sccm         |
|          | H <sub>2</sub> O | 1 s           | 15 s       |                  |                  |
| ZnO      | DEZn             | 0.3 s         | 20 s       | 100°C            |                  |
|          | H <sub>2</sub> O | 0.3 s         | 25 s       |                  |                  |

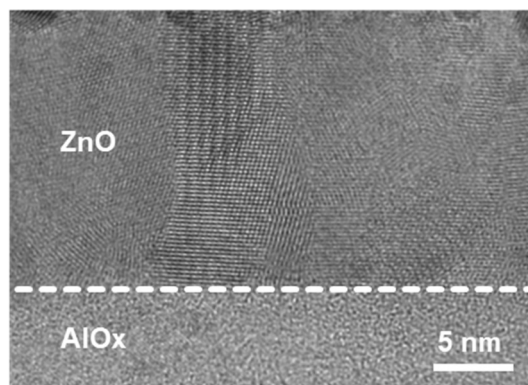

**Figure S2.** HRTEM image of deposited ZnO film by ALD at 100°C.

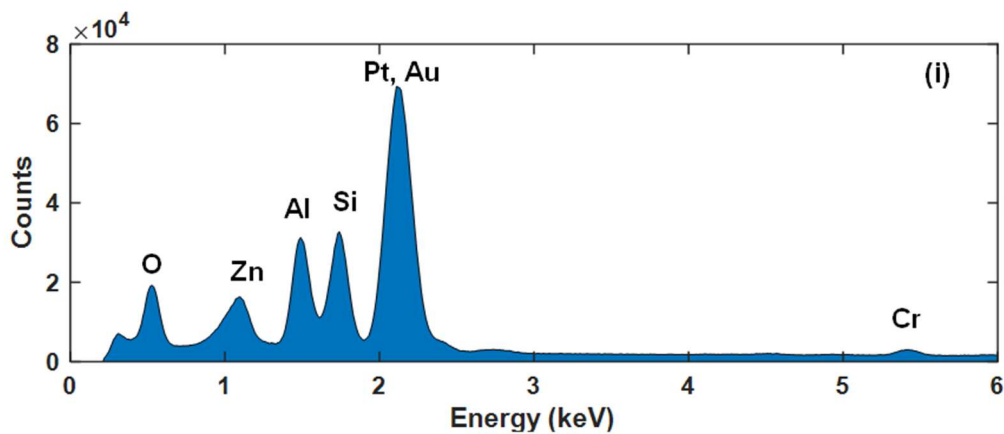

**Figure S3.** EDS spectrum from the EDS mapping of the TFT memory for element analysis

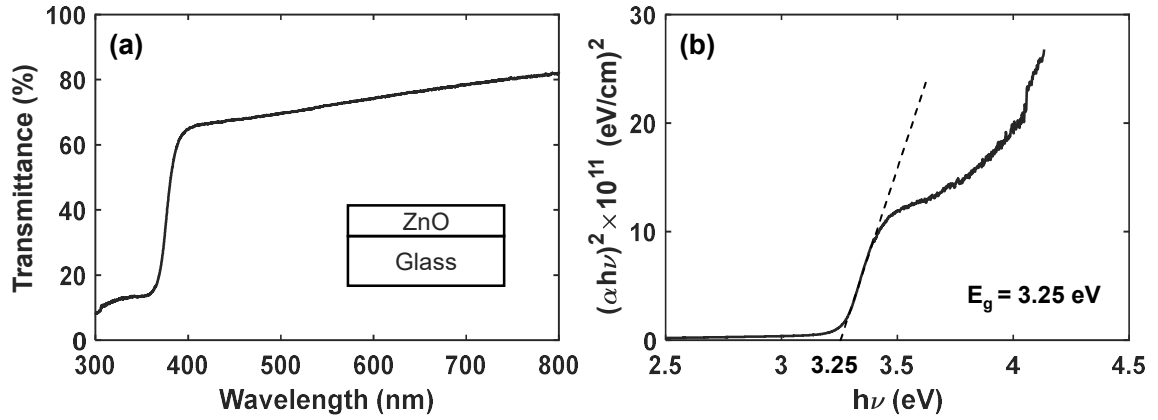

**Figure S4.** (a) Transmittance spectrum curve of fabricated ZnO on glass; (b) Tauc plot to determine the optical band gap of the fabricated ZnO

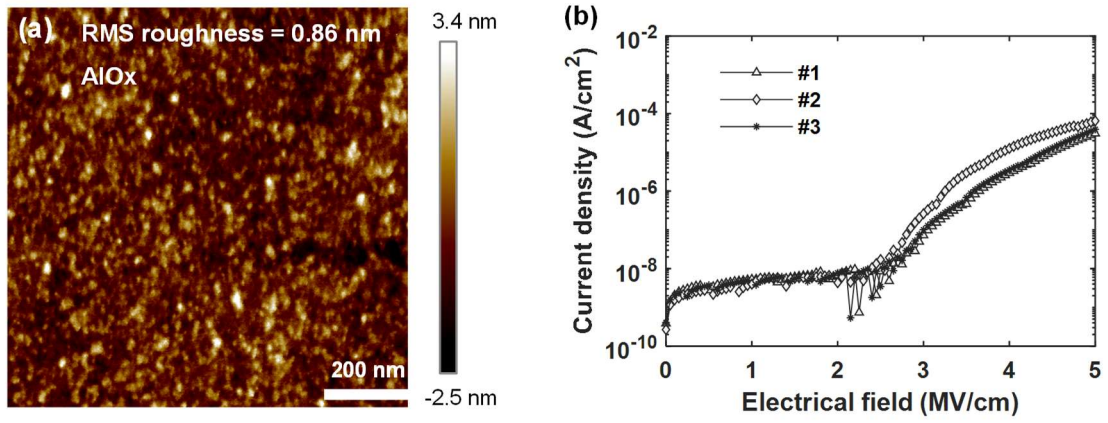

**Figure S5.** (a) AFM image of fabricated AlOx tunneling oxide; (b) Current density versus electrical field curves of the Au-Cr/AlOx/p++ Si structure, with 3 different measurement positions, which shows the uniform and consistent property

## Calculation procedure of the power consumption of the TFT memory during programming and erasing

During programming and erasing, the power consumption can be calculated by

$$W_P = V_P \int_0^{t_P} I_P(t) dt = V_P Q_e = V_P q N_{e,P}$$

$$W_E = V_E \int_0^{t_E} I_E(t) dt = V_E Q_E = |V_E| q N_{e,E}$$

$V_P = 15 \text{ V}$ , the program voltage

$V_E = -15 \text{ V}$ , the erase voltage

$N_{e,P}$ : number of electrons trapped by Au NCs under 15 V/100 ms programming

$N_{e,E}$ : number of electrons detrapped from Au NCs under -15 V/1 s erasing

$$N_{e,P} = C_{BO} \cdot \frac{\Delta V_{th,P}}{q}$$

$$N_{e,E} = C_{BO} \cdot \frac{\Delta V_{th,E}}{q}$$

Where

$C_{BO} = 1.45 \times 10^{-11}$  F, measured capacitance of 50 nm AlO<sub>x</sub> blocking oxide

$\Delta V_{th,P} = 10$  V, threshold voltage shift from fresh state to programmed state under 15 V/100 ms programming

$\Delta V_{th,E} = 9.8$  V, threshold voltage shift from programmed state to erases state under -15 V/1 s programming

Thus

$$W_P = V_P C_{BO} \Delta V_{th,P} = 15 \text{ V} \times 1.45 \times 10^{-11} \text{ F} \times 10 \text{ V} = 2.18 \text{ nJ}$$

$$W_E = |V_E| C_{BO} \Delta V_{th,E} = 15 \text{ V} \times 1.45 \times 10^{-11} \text{ F} \times 9.8 \text{ V} = 2.13 \text{ nJ}$$
